# Supplementary material for: New insights into ginsenoside Rg1 regulating the niche to inhibit age-induced germline stem cells depletion through targeting ECR/BMP signaling pathway in Drosophila
Source: publisher site journal article supplement (doi:10.18632/aging.205548), 2024-02-14
Supplement: Supplementary file [file aging-v16i4-205548-supplementary-material-SD1.pdf]

SUPPLEMENTARY FIGURES

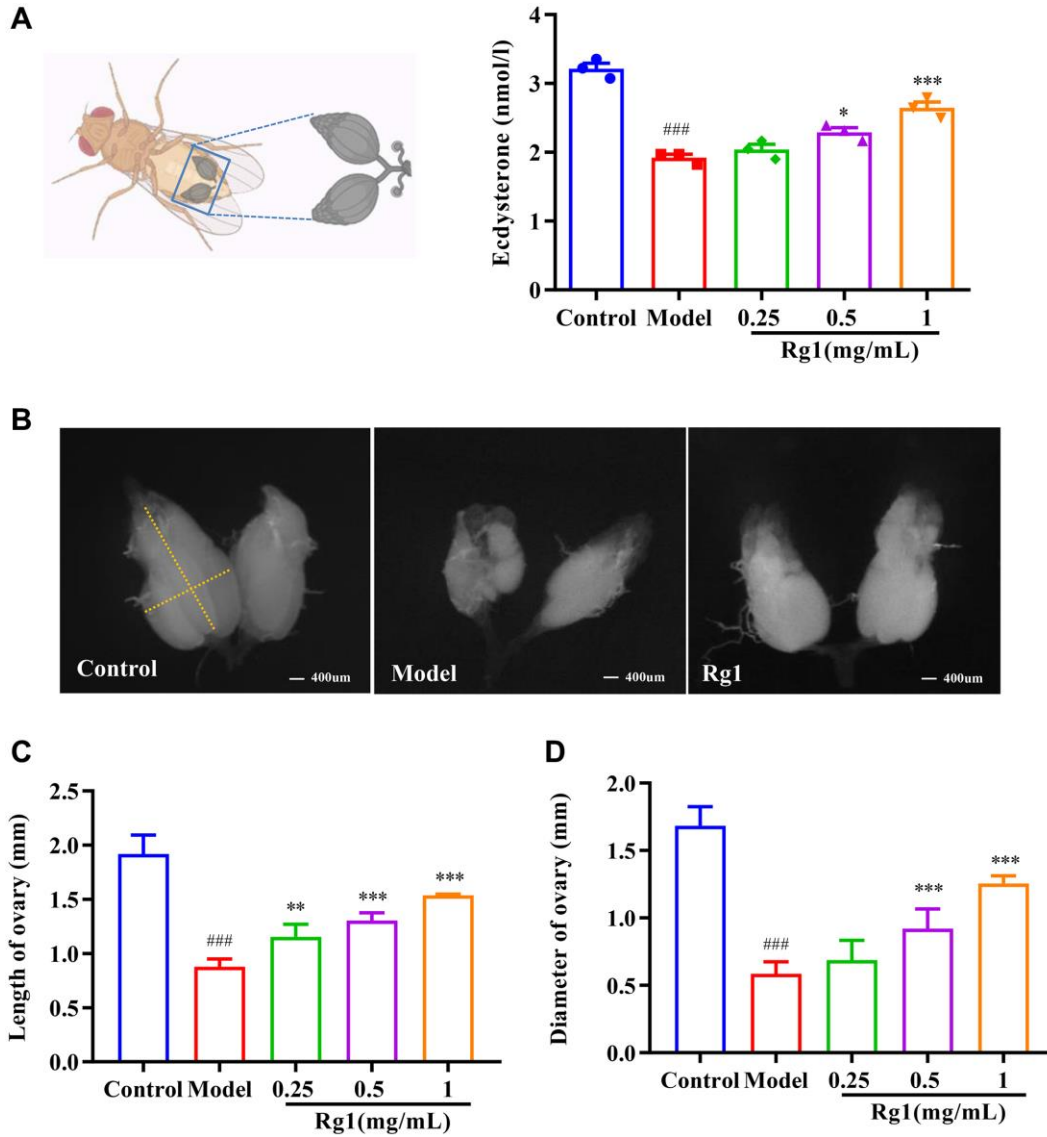

**Supplementary Figure 1. Effects of ginsenoside Rg1 on ovarian function and aging in *Drosophila*.** (A) Ecdysterone level; (B) Ovary size ( $n = 10$ ), Scale bar = 400  $\mu\text{m}$ ; (C) Length of ovary; (D) Diameter of ovary; Results were analyzed with one-way ANOVA. Data are shown as the mean  $\pm$  SD; ### $p < 0.001$  compared with Control (7-day-old female *Drosophila*); \* $p < 0.05$ , \*\* $p < 0.01$ , \*\*\* $p < 0.001$  compared with Model (35-day-old female *Drosophila*).

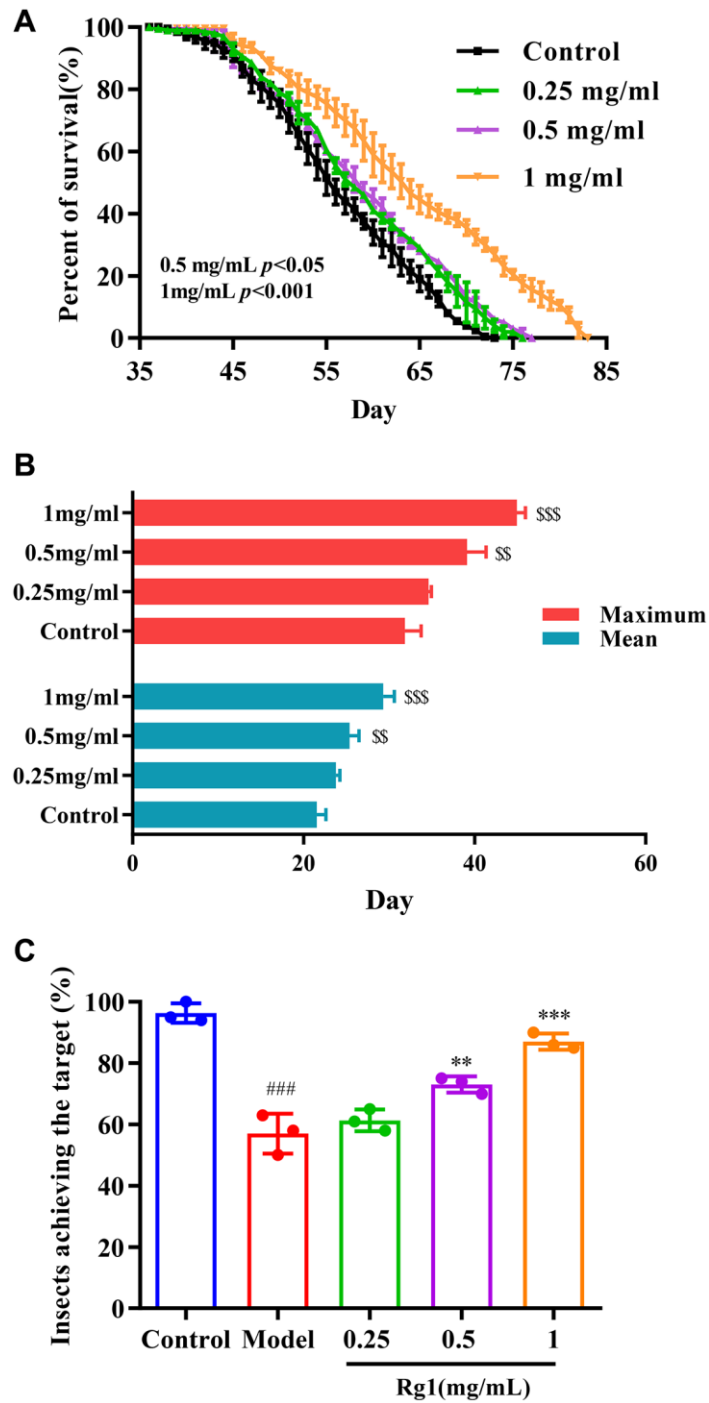

**Supplementary Figure 2. Effects of ginsenoside Rg1 on viability in *Drosophila*.** (A) Percent of survival ( $n = 200$ ); (B) Mean and maximum lifespans; (C) Climbing ability ( $n = 100$ ); Results were analyzed with one-way ANOVA. Data are shown as the mean  $\pm$  SD; ### $p < 0.001$  compared with Control (7-day-old female *Drosophila*); \* $p < 0.05$ , \*\* $p < 0.01$ , \*\*\* $p < 0.001$  compared with Model (35-day-old female *Drosophila*);  $^{SS}p < 0.01$ ,  $^{SSS}p < 0.001$  compared with Control (35-day-old female *Drosophila*).

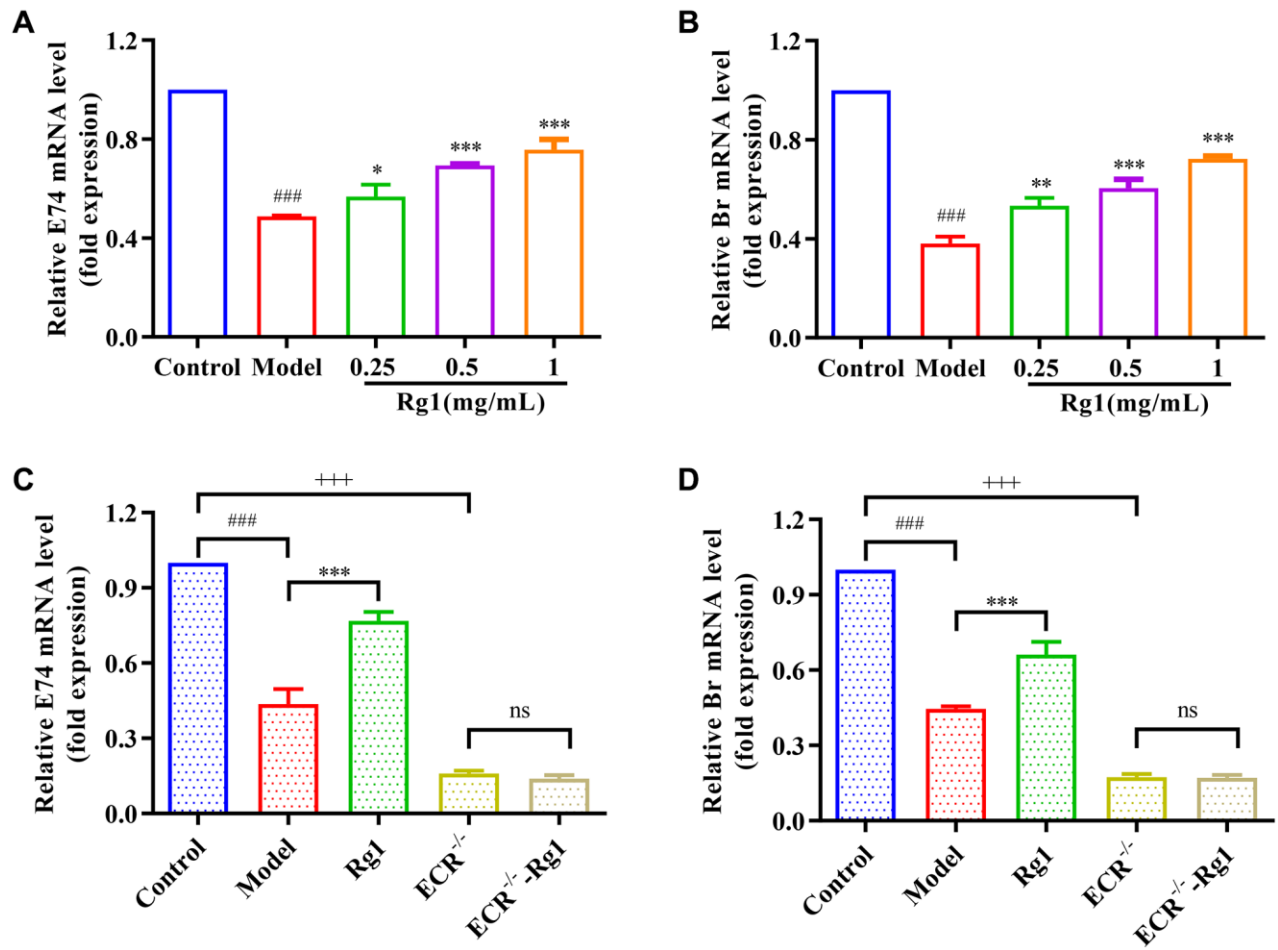

**Supplementary Figure 3. Effect of ginsenoside Rg1 on downstream signal of ECR.** (A) Relative mRNA-level expression of gene encoding inducible protein E74 in elderly female *Drosophila*; (B) Relative mRNA-level expression of gene encoding transcription factor Br in elderly female *Drosophila*; (C) Relative mRNA-level expression of gene encoding inducible protein E74 in ECR mutant *Drosophila*; (D) Relative mRNA-level expression of gene encoding transcription factor Br in ECR mutant *Drosophila*. Results were analysed with one-way ANOVA. Data are shown as the mean  $\pm$  SD ( $n = 100$ ); ### $p < 0.001$  compared with Control (7-day-old female *Drosophila*); \* $p < 0.05$ , \*\* $p < 0.01$ , \*\*\* $p < 0.001$  compared with Model (35-day-old female *Drosophila*); +++ $p < 0.001$  compared with Control (7-day-old female *Drosophila*); Abbreviation: ns: no significance.

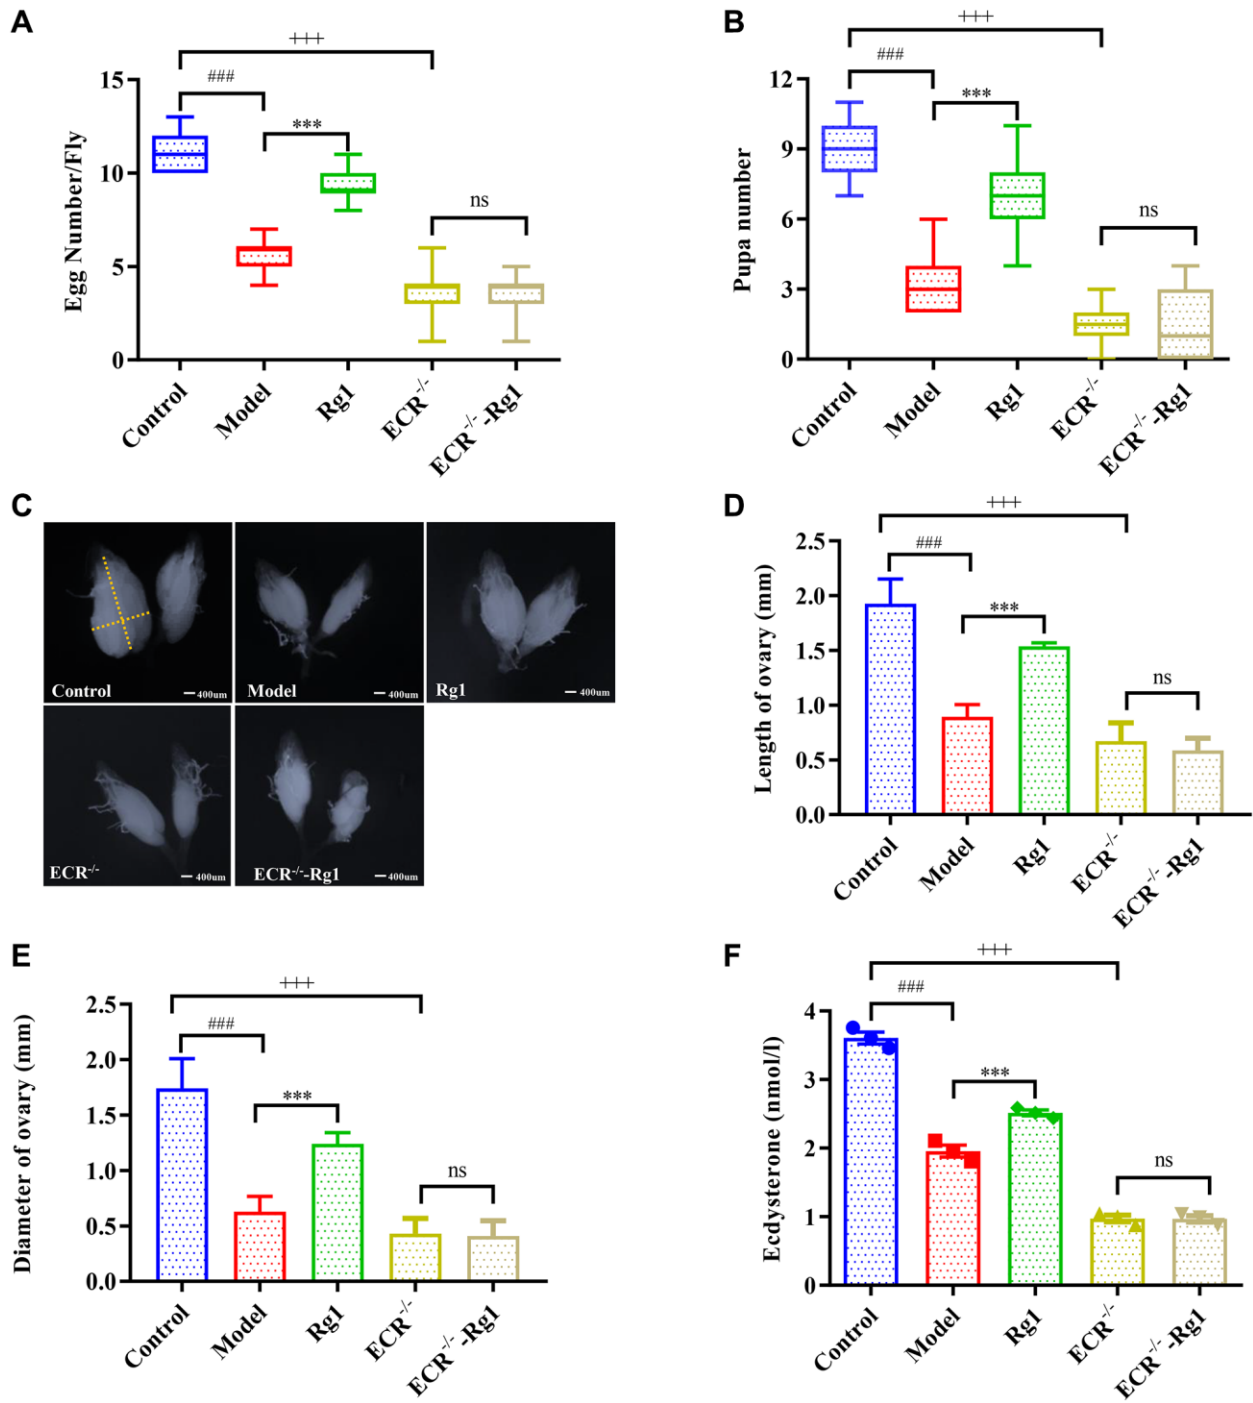

**Supplementary Figure 4. Effects of ginsenoside Rg1 on ovarian function in ECR mutant *Drosophila*.** (A) Number of eggs ( $n = 100$ ); (B) Number of pupae ( $n = 100$ ); (C) Ovary size ( $n = 10$ ), Scale bar = 400  $\mu\text{m}$ ; (D) Length of ovary; (E) Diameter of ovary; (F) Ecdysterone level ( $n = 100$ ). Results were analysed with one-way ANOVA. Data are shown as the mean  $\pm$  SD ( $n = 100$ ); ### $p < 0.001$  compared with Control (7-day-old female *Drosophila*); \*\*\* $p < 0.001$  compared with Model (35-day-old female *Drosophila*); +++ $p < 0.001$  compared with Control (7-day-old female *Drosophila*); Abbreviation: ns: no significance.
